# Supplementary material
Source: Research Square preprint supplement (doi:10.21203/rs.3.rs-8995080/v1)
Supplement: Supplementary file 1 [file 27cccd0914f76acfbae5bacd.docx]

**Supplementary Materials**

The full elemental concentrations for input raw materials and paint samples are summarized in Tables 2.1a, 2.1b and 2.2a and 2.2b respectively.

**Table 2.1a: Elemental Concentrations (ppm) in the Input Raw Materials by XRF**

| **INPUTS RAW MATERIALS** | **ELEMENTS (PPM)** | | | | | | | | | | | | |
| --- | --- | --- | --- | --- | --- | --- | --- | --- | --- | --- | --- | --- | --- |
| SAMPLE | Mg | Al | Si | P | S | K | Ca | Ti | V | Cr | Mn | Co | Fe |
| AMMONIUM HYDROXIDE | 0 | 2324 | 3232 | 123 | 9394 | 393 | 244 | 0 | 2243 | 345 | 245 | 2244 | 5553 |
| CALGON | 0 | 6960 | 4929 | 18098 | 99074 | 180 | 410 | 0 | 85 | 0 | 0 | 0 | 2842 |
| CALCIUM CARBONATE | 20837 | 3698 | 10462 | 1252 | 1544 | 0 | 248135 | 0 | 64 | 34 | 0 | 0 | 4523 |
| FORMALIN | 0 | 5989 | 1293 | 3923 | 1309 | 309 | 291 | 0 | 89 | 22 | 39 | 203 | 2313 |
| NASTROL | 0 | 1515 | 1978 | 1171 | 6237 | 304 | 1128 | 0 | 29 | 0 | 0 | 0 | 2561 |
| PVA | 0 | 306 | 624 | 337 | 2191 | 0 | 412 | 0 | 115 | 0 | 18 | 0 | 2058 |
| RED OXIDE | 0 | 118 | 129 | 196 | 419 | 391 | 185 | 0 | 153 | 621 | 800 | 13447 | 540466 |
| RESIN | 0 | 0 | 0 | 436 | 4626 | 0 | 269 | 0 | 79 | 26 | 0 | 0 | 1231 |
| TITANIUM OXIDE | 0 | 4200 | 3054 | 1067 | 3386 | 0 | 25905 | 598464 | 1466 | 0 | 47 | 0 | 2493 |
| YELLOW OXIDE | 0 | 906 | 4784 | 284 | 1095 | 63 | 575 | 0 | 75 | 645 | 776 | 9499 | 504159 |
| MINIMUM | 0 | 0 | 0 | 123 | 419 | 0 | 185 | 0 | 29 | 0 | 0 | 0 | 1231 |
| MAXIMUM | 20837 | 6960 | 10462 | 18098 | 99074 | 393 | 248135 | 598464 | 2243 | 645 | 800 | 13447 | 540466 |
| MEAN | 2084 | 2602 | 3049 | 2689 | 12928 | 164 | 27755 | 59846 | 440 | 169 | 193 | 2539 | 106819 |
| STANDARD DEVIATION | 6589 | 2507 | 3153 | 5529 | 30396 | 171 | 77846 | 189251 | 768 | 266 | 322 | 4849 | 219155 |

**Table 2.1b: Elemental Concentrations (ppm) in the Input Raw Materials by XRF (Continuation)**

| **INPUTS RAW MATERIALS** | **ELEMENTS (PPM)** | | | | | | | | | | | | | |
| --- | --- | --- | --- | --- | --- | --- | --- | --- | --- | --- | --- | --- | --- | --- |
|  | Ni | Cu | Zn | As | Pb | W | Au | Ag | Rb | Nb | Mo | Cd | Sn | Sb |
| AMMONIUM HYDROXIDE | 1333 | 2432 | 1776 | 0 | 114 | 424 | 0 | 75 | 4 | 56 | 1298 | 0 | 9754 | 6803 |
| CALGON | 1439 | 2089 | 1932 | 0 | 78 | 2235 | 0 | 185 | 0 | 0 | 1277 | 0 | 39335 | 36676 |
| CALCIUM CARBONATE | 1142 | 813 | 1713 | 0 | 82 | 985 | 0 | 0 | 4 | 0 | 1174 | 0 | 28829 | 26169 |
| FORMALIN | 1209 | 2089 | 2981 | 0 | 125 | 922 | 0 | 29 | 9 | 29 | 1672 | 0 | 21392 | 22919 |
| NASTROL | 1290 | 1627 | 2061 | 0 | 88 | 677 | 0 | 136 | 0 | 116 | 1458 | 0 | 36359 | 31539 |
| POLYVINYL ACETATE | 1441 | 2669 | 2088 | 0 | 69 | 1680 | 326 | 0 | 0 | 0 | 1672 | 1 | 41608 | 36255 |
| RED OXIDE | 320 | 203 | 574 | 0 | 174 | 0 | 0 | 34 | 4 | 0 | 2298 | 0 | 7399 | 6555 |
| RESIN | 1050 | 1782 | 1744 | 0 | 40 | 1343 | 171 | 51 | 0 | 105 | 1802 | 0 | 30428 | 25640 |
| TITANIUM OXIDE | 614 | 672 | 1312 | 0 | 83 | 552 | 0 | 83 | 13 | 35 | 1483 | 0 | 18495 | 17501 |
| YELLOW OXIDE | 508 | 253 | 635 | 0 | 178 | 394 | 0 | 65 | 7 | 0 | 1898 | 0 | 8834 | 7868 |
| **MEAN** | 1035 | 1463 | 1682 | 0 | 103 | 921 | 50 | 66 | 4 | 34 | 1603 | 0 | 24243 | 21793 |
| **MINIMUM** | 320 | 203 | 574 | 0 | 45 | 0 | 0 | 0 | 0 | 0 | 1174 | 0 | 7399 | 6555 |
| **MAXIMUM** | 1441 | 2669 | 2981 | 0 | 40 | 2235 | 326 | 185 | 13 | 116 | 2298 | 1 | 41608 | 36676 |
| **STANDARD DEVIATION** | 407 | 907 | 710 | 0 | 178 | 671 | 111 | 59 | 5 | 45 | 340 | 0 | 12943 | 11691 |

**Table 2.2a: Elemental Concentrations (ppm) in the Paints by XRF**

|  | **ELEMENTS (PPM)** | | | | | | | | | | | | | |
| --- | --- | --- | --- | --- | --- | --- | --- | --- | --- | --- | --- | --- | --- | --- |
| SAMPLE | Mg | Al | Si | P | S | K | Ca | Ti | V | Cr | Mn | Co | Fe | Ni |
| Apa coat | 0 | 1403 | 2008 | 769 | 1788 | 0 | 106440 | 0 | 34 | 38 | 46 | 1384 | 60731 | 1097 |
| Fine Coat | 0 | 2905 | 4008 | 609 | 1228 | 0 | 75534 | 0 | 128 | 89 | 46 | 790 | 60773 | 1318 |
| Galaxy | 3057 | 5051 | 4965 | 1147 | 3044 | 0 | 180632 | 1794 | 12 | 20 | 52 | 0 | 3950 | 1338 |
| Perfect | 0 | 5435 | 6582 | 856 | 1677 | 0 | 105417 | 3961 | 0 | 0 | 0 | 0 | 5526 | 964 |
| Princess | 0 | 1335 | 4502 | 658 | 2621 | 0 | 34524 | 1951 | 32 | 24 | 23 | 455 | 13453 | 1023 |
| Radius | 0 | 1468 | 3495 | 639 | 1678 | 0 | 99212 | 4219 | 71 | 0 | 45 | 182 | 11050 | 1351 |
| Rainlux | 0 | 2656 | 3575 | 899 | 1963 | 0 | 115479 | 23531 | 119 | 0 | 0 | 0 | 4262 | 1328 |
| Realux | 0 | 0 | 0 | 583 | 4990 | 0 | 1154 | 0 | 43 | 177 | 174 | 3610 | 90990 | 992 |
| Sedem | 0 | 1528 | 1346 | 693 | 5824 | 0 | 877 | 293338 | 2628 | 0 | 36 | 310 | 1919 | 1580 |
| Vila paint | 0 | 415 | 532 | 437 | 3700 | 0 | 413 | 81231 | 180 | 0 | 12 | 277 | 1501 | 1610 |
| Mean | 306 | 2220 | 3101 | 729 | 2851 | 0 | 71968 | 41003 | 325 | 35 | 43 | 701 | 25416 | 1260 |
| Minimum | 0 | 0 | 0 | 437 | 1228 | 0 | 413 | 0 | 0 | 0 | 0 | 0 | 1501 | 964 |
| Maximum | 3057 | 5435 | 6582 | 1147 | 5824 | 0 | 180632 | 293338 | 2628 | 177 | 174 | 3610 | 90990 | 1610 |
| Standard deviation | 917 | 1723 | 1981 | 189 | 1467 | 0 | 57753 | 87423 | 770 | 54 | 47 | 1052 | 30943 | 221 |

**Table 2.2b: Elemental Concentrations (ppm) in the paints by XRF (Continuation)**

|  | **ELEMENTS** | | | | | | | | | | | | |
| --- | --- | --- | --- | --- | --- | --- | --- | --- | --- | --- | --- | --- | --- |
| **SAMPLE** | Cu | Zn | As | Pb | W | Au | Ag | Rb | Nb | Mo | Cd | Sn | Sb |
| **Apa coat** | 946 | 1705 | 0 | 81 | 940 | 0 | 9 | 0 | 0 | 1388 | 0 | 28610 | 26319 |
| **Fine Coat** | 1072 | 1851 | 0 | 102 | 1528 | 0 | 86 | 8 | 104 | 1558 | 1 | 39054 | 33911 |
| **Galaxy** | 1082 | 1936 | 0 | 94 | 1110 | 0 | 72 | 0 | 0 | 1304 | 0 | 36797 | 33756 |
| **Perfect** | 2203 | 1927 | 0 | 106 | 1036 | 0 | 84 | 0 | 0 | 1504 | 0 | 29398 | 26409 |
| **Princess** | 2345 | 2352 | 123 | 94 | 1876 | 0 | 56 | 0 | 56 | 2301 | 1 | 32421 | 23134 |
| **Radius** | 1786 | 2096 | 0 | 90 | 1558 | 89 | 86 | 0 | 0 | 1300 | 0 | 43812 | 38434 |
| **Rainlux** | 2628 | 2171 | 0 | 120 | 1565 | 0 | 0 | 0 | 0 | 1602 | 0 | 37440 | 35728 |
| **Realux** | 4490 | 2717 | 338 | 711 | 5094 | 0 | 0 | 0 | 118 | 2003 | 2 | 34608 | 28654 |
| **Sedem** | 955 | 2649 | 1226 | 1066 | 1234 | 621 | 0 | 0 | 0 | 2063 | 0 | 37051 | 34432 |
| **Vila paint** | 560 | 2051 | 4355 | 1687 | 370 | 4993 | 33 | 0 | 0 | 1296 | 0 | 39764 | 33014 |
| **Mean** | 1807 | 2146 | 604 | 415 | 1631 | 570 | 43 | 1 | 28 | 1632 | 0 | 35896 | 31379 |
| **Minimum** | 560 | 1705 | 0 | 561 | 370 | 0 | 0 | 0 | 0 | 1296 | 0 | 28610 | 23134 |
| **Maximum** | 4490 | 2717 | 4355 | 81 | 5094 | 4993 | 86 | 8 | 118 | 2301 | 2 | 43812 | 38434 |
| **Standard deviation** | 1114 | 317 | 1302 | 1687 | 1222 | 1486 | 36 | 2 | 45 | 344 | 1 | 4485 | 4674 |

Kind regards,
Osuolale Peter Taiwo

Corresponding author: Peter T Osuolale

Email address: [pt.osuolale@kingsuniversity.edu.ng](mailto:pt.osuolale@kingsuniversity.edu.ng); [petsun14@gmail.com](mailto:petsun14@gmail.com)
